# Supplementary material for: Knowledge on Parental Hesitancy toward COVID-19 Vaccination of Children 5–11 Years Old
Source: Vaccines (Basel). 2023 Mar 3;11(3):587. doi: 10.3390/vaccines11030587 (PMC10051409; doi:10.3390/vaccines11030587)
Supplement: Supplementary file 1 [file vaccines-11-00587-s001.zip › vaccines-2188691-supplementary.pdf]

## Supplementary Material S1. Questionnaire of the survey.

The questionnaire consisted of 5 sections:

- Collection of demographic data (i.e., age, gender, area of residence, educational qualification, occupation, annual income of the family unit, number of children, number of children between 5 and 11 years of age, nationality);
- Acceptability and general vaccine in the pre-pandemic era;
- Perception of the risk of COVID-19 disease;
- Perception of the safety and efficacy of anti-COVID vaccines;
- Propensity for anti-COVID vaccination for oneself and for children.

The 3 clusters (i.e., “Favorable”, “Doubtful” and “Hesitant/Reluctant”) were defined by using the method of grouping by median (k-medians) with Euclidean distance of the answers to the question Q21:

- I had my children vaccinated/I will definitely have my children vaccinated;
- I have no intention of vaccinating my children;
- The vaccine has an excellent level of safety;
- The vaccine has not been sufficiently tested;
- I want to wait before vaccinating;
- My children are healthy, so they do not need vaccines;
- I have vaccinated/will vaccinate my children because they are vulnerable to pathological conditions.

Information Scores were also constructed based on the agreement of some statements. The Information Score on pediatric vaccines was constructed with the arithmetic mean of the following scores:

- Q10.S1. Pediatric vaccines are useful for preventing life-threatening diseases (3 for values  $\geq 4$ ; 2 for values equal to 3; 1 for values  $\leq 2$ );
- Q10.S2. Pediatric vaccines have saved millions of lives since they were invented (3 for values  $\geq 4$ ; 2 for values equal to 3; 1 for values  $\leq 2$ );
- Q10.S3. Pediatric vaccines are poorly studied (1 for values  $\geq 4$ ; 2 for values equal to 3; 3 for values  $\leq 2$ );
- Q10.S4. Pediatric vaccines often lead to serious adverse events (1 for values  $\geq 4$ ; 2 for values equal to 3; 3 for values  $\leq 2$ );
- Q10.S6. Vaccinating children is important to stop some epidemics (i.e., measles, rubella, pertussis and meningococcal meningitis) (3 for values  $\geq 4$ ; 2 for values equal to 3; 1 for values  $\leq 2$ ).

The Information Score on COVID-19 was constructed with the arithmetic mean of the following scores:

- Q13.S2. COVID-19 is a normal influenza or little more (1 for values  $\geq 4$ ; 2 for values equal to 3; 3 for values  $\leq 2$ );
- Q13.S4. The pandemic has deteriorated the possibilities of prevention and treatment by the health system (3 for values  $\geq 4$ ; 2 for values equal to 3; 1 for values  $\leq 2$ );
- Q13.S7. Children and young people, even if they get sick, never have COVID-19-related problems (1 for values  $\geq 4$ ; 2 for values equal to 3; 3 for values  $\leq 2$ );
- Q13.S8. COVID-19 is dangerous only for the elderly and those with pathologies (1 for

Values  $\geq 4$ ; 2 for values equal to 3; 3 for values  $\leq 2$ ).

The Information Score on anti-COVID vaccines was constructed with the arithmetic mean of the following scores:

- Q17.S1. Authorized anti-COVID vaccines are still experimental (1 for values  $\geq 4$ ; 2 for values equal to 3; 3 for values  $\leq 2$ );
- Q17.S2. Many of the dangerous effects on the health of the recipient of the anti-COVID vaccines are not known (1 for values  $\geq 4$ ; 2 for values equal to 3; 3 for values  $\leq 2$ );
- Q17.S4. Anti-COVID vaccines are useless to contain the spread of the virus (1 for values  $\geq 4$ ; 2 for values equal to 3; 3 for values  $\leq 2$ );
- Q17.S5. Anti-COVID vaccines will give rise to dangerous variants of the virus (1 for values  $\geq 4$ ; 2 for values equal to 3; 3 for values  $\leq 2$ );
- Q17.S7. Anti-COVID vaccines are the best way to avoid deaths and hospitalizations (3 for values  $\geq 4$ ; 2 for values equal to 3; 1 for values  $\leq 2$ );

Similarly, a Fear Score of vaccines was constructed by using the scores on the following statements:

- Q11.S2. When I receive invitations for vaccinations, I start to feel anxious (3 for values  $\geq 4$ ; 2 for values equal to 3; 1 for values  $\leq 2$ );
- Q11.S3. I trust the institutions; the proposed vaccines are the best choice for my children (1 for values  $\geq 4$ ; 2 for values equal to 3; 3 for values  $\leq 2$ );
- Q11.S6. After vaccination, I am afraid of serious adverse events (3 for values  $\geq 4$ ; 2 for values equal to 3; 1 for values  $\leq 2$ ).

|                                                                                                                                                    |                                                |
|----------------------------------------------------------------------------------------------------------------------------------------------------|------------------------------------------------|
| <b>For the parent</b><br>Did you give your consent to participate in this survey and did your child agree?<br>Yes    No<br>If yes, please continue |                                                |
|                                                                                                                                                    |                                                |
| <b>Demographic Data</b>                                                                                                                            |                                                |
| Q1                                                                                                                                                 | Age                                            |
| Q2                                                                                                                                                 | Gender                                         |
|                                                                                                                                                    | M<br>F<br>Non-binary<br>I prefer not to answer |
| Q3                                                                                                                                                 | CAP (residence)                                |
| Q4                                                                                                                                                 | Education                                      |

|                                               |                                                                                                                                                                       |
|-----------------------------------------------|-----------------------------------------------------------------------------------------------------------------------------------------------------------------------|
|                                               | Lower secondary school diploma<br>High school diploma<br>BA<br>MA<br>PhD<br>I prefer not to answer                                                                    |
| Q5                                            | Work condition                                                                                                                                                        |
|                                               | Permanent employee<br>Temporary employee<br>Self-employed<br>Retired<br>Unemployed - Unpaid domestic worker<br>I prefer not to answer                                 |
| Q6                                            | Annual family income                                                                                                                                                  |
|                                               | <15,000€<br>15,001-28,000€<br>28,001-55,000€<br>55,001-75,000€<br>>75,000€<br>I prefer not to answer                                                                  |
| Q7                                            | Number of children                                                                                                                                                    |
| Q8                                            | Number of children between 12 and 17 of age                                                                                                                           |
| Q9                                            | Nationality                                                                                                                                                           |
|                                               | Italy<br>Western Europe<br>Eastern Europe<br>North Africa<br>Central Africa<br>Asia, Americas<br>I prefer not to answer)                                              |
| <b>Data on pre-pandemic vaccine hesitancy</b> |                                                                                                                                                                       |
| Q10                                           | Think back to recommended or mandatory paediatric vaccinations: how much do you agree with the following statements? Cast a vote from 1 (disagree) to 5 (fully agree) |
| Q10.S1                                        | Paediatric vaccines are useful for preventing life-threatening diseases                                                                                               |
| Q10.S2                                        | Paediatric vaccines have saved millions of lives since they were invented                                                                                             |

|                                         |                                                                                                                                                                                                       |
|-----------------------------------------|-------------------------------------------------------------------------------------------------------------------------------------------------------------------------------------------------------|
| Q10.S3                                  | Paediatric vaccines are poorly studied                                                                                                                                                                |
| Q10.S4                                  | Paediatric vaccines often lead to serious adverse events                                                                                                                                              |
| Q10.S5                                  | Paediatric vaccines are safe                                                                                                                                                                          |
| Q10.S6                                  | Vaccinating children is important to stop some epidemics (e.g. measles, rubella, whooping cough, meningococcal meningitis)                                                                            |
| Q11                                     | We ask you to rethink your experience with your children's paediatric vaccination process: how much do you agree with the following statements? Cast a vote from 1 (disagree) to 5 (fully agree)      |
| Q11.S1                                  | I appreciate it when I get invitations for my kids 'vaccinations                                                                                                                                      |
| Q11.S2                                  | When I receive invitations for vaccinations, I start to feel anxious                                                                                                                                  |
| Q11.S3                                  | I trust the institutions, the proposed vaccines are the best choice for my children                                                                                                                   |
| Q11.S4                                  | I do not trust what is proposed, there is not enough information                                                                                                                                      |
| Q11.S5                                  | The information that comes from the AUSL or from the institutions is partial or incorrect                                                                                                             |
| Q11.S6                                  | After vaccination, I am afraid of serious adverse events                                                                                                                                              |
| Q11.S7                                  | I consult my doctor and decide on the basis of his advice                                                                                                                                             |
| Q12                                     | Did all of your children have paediatric vaccinations according to the recommended schedule?                                                                                                          |
|                                         | No, because I didn't have enough reassurance<br>Yes<br>No but for delays due to health reasons<br>I prefer not to answer                                                                              |
| <b>Data on Covid-19 risk perception</b> |                                                                                                                                                                                                       |
| Q13                                     | We ask you to rethink your experience throughout the pandemic period, from March 2020 to today: how much do you agree with the following statements? Cast a vote from 1 (disagree) to 5 (fully agree) |
| Q13.S1                                  | The pandemic has been magnified by governments and the media                                                                                                                                          |
| Q13.S2                                  | Covid-19 is a normal flu or a little more                                                                                                                                                             |
| Q13.S3                                  | Covid-19 scared/scares me                                                                                                                                                                             |

|                                                         |                                                                                                                                                                                           |
|---------------------------------------------------------|-------------------------------------------------------------------------------------------------------------------------------------------------------------------------------------------|
| Q13.S4                                                  | The pandemic has deteriorated the possibilities of prevention and treatment by the Health System                                                                                          |
| Q13.S5                                                  | Long-Covid is a risk that I would not like to take                                                                                                                                        |
| Q13.S6                                                  | It is easy to avoid the virus that causes Covid-19 disease                                                                                                                                |
| Q13.S7                                                  | Children and young people, even if they get sick, never have problems                                                                                                                     |
| Q13.S8                                                  | The disease is dangerous only for elderly people and those with pathologies                                                                                                               |
| Q14                                                     | Have you or a family member or houseold had Covid-19 (positive swab)?                                                                                                                     |
|                                                         | Yes<br>No<br>I prefer not to answer                                                                                                                                                       |
| Q15                                                     | Have you or a family member or houseold had symptoms or have you been hospitalized for Covid-19?                                                                                          |
|                                                         | Yes<br>No<br>I prefer not to answer                                                                                                                                                       |
| Q16                                                     | Has a family member or houseold died due to Covid-19?                                                                                                                                     |
|                                                         | Yes<br>No<br>I prefer not to answer                                                                                                                                                       |
| <b>Data on perception of the anti-Covid vaccination</b> |                                                                                                                                                                                           |
| Q17                                                     | We now ask you to rethink the information you have received on anti-Covid vaccines: how much do you agree with the following statements? Cast a vote from 1 (disagree) to 5 (fully agree) |
| Q17.S1                                                  | Authorized vaccines are still experimental                                                                                                                                                |
| Q17.S2                                                  | Many dangerous health effects of vaccines are unknown                                                                                                                                     |
| Q17.S3                                                  | Vaccines are safe for me                                                                                                                                                                  |
| Q17.S4                                                  | Vaccines are useless to contain the spread of the virus                                                                                                                                   |
| Q17.S5                                                  | Vaccines will give rise to dangerous variants of the virus                                                                                                                                |
| Q17.S6                                                  | Vaccines are produced in ways that I cannot accept for religious reasons                                                                                                                  |

|                                                                                    |                                                                                                                                                                                      |
|------------------------------------------------------------------------------------|--------------------------------------------------------------------------------------------------------------------------------------------------------------------------------------|
| Q17.S7                                                                             | Vaccines are the best way to avoid deaths and hospitalizations                                                                                                                       |
| Q17.S8                                                                             | mRNA vaccines (Pfizer and Moderna) are safe, adenoviral vector vaccines (AstraZeneca and J&J) are not                                                                                |
| Q18                                                                                | What are your main sources of information on vaccines? Express a vote from 1 ("Not authoritative") to 5 ("Most authoritative source"), express 0 for "Never consulted"               |
| Q18.S1                                                                             | Family Doctor or Paediatrician                                                                                                                                                       |
| Q18.S2                                                                             | Doctor/s within the National Health System (Public Hygiene Service, Community Paediatrics, hospital doctors)                                                                         |
| Q18.S3                                                                             | Traditional TV and media (newspapers, magazines) or social network sites/channels connected to them                                                                                  |
| Q18.S4                                                                             | Religious personalities (priests, imams, rabbis...)                                                                                                                                  |
| Q18.S5                                                                             | Social networks (Facebook groups, Twitter, Instagram, Whatsapp, Telegram...)                                                                                                         |
| Q18.S6                                                                             | Social dissemination profiles (university professors, researchers or popularizers such as, by way of example only: Roberta Villa, Roberto Burioni, Guido Silvestri, Antonella Viola) |
| Q18.S7                                                                             | Friends/acquaintances                                                                                                                                                                |
| Q18.S8                                                                             | Websites and/or institutional social channels (ISS, AIFA, Ministry of Health, World Health Organization, ECDC...)                                                                    |
| Q18.S9                                                                             | Counter information websites                                                                                                                                                         |
| Q18.S10                                                                            | Independent doctors                                                                                                                                                                  |
| Q19                                                                                | Have you done or booked the anti-Covid vaccination?                                                                                                                                  |
|                                                                                    | Yes<br>No<br>I prefer not to answer                                                                                                                                                  |
| Q20                                                                                | Would you recommend anti-Covid vaccination to your friends/acquaintances?                                                                                                            |
|                                                                                    | Yes<br>No<br>I prefer not to answer                                                                                                                                                  |
| <b>Data on perception of anti-Covid vaccination in adolescents 12-17 years old</b> |                                                                                                                                                                                      |

|        |                                                                                                                                                                                                            |
|--------|------------------------------------------------------------------------------------------------------------------------------------------------------------------------------------------------------------|
| Q21    | We ask you to focus now on the possibility of vaccinating your children between 12 and 17 years old: how much do you agree with the following statements? Cast a vote from 1 (disagree) to 5 (fully agree) |
| Q21.S1 | I have vaccinated/I will definitely have my children vaccinated                                                                                                                                            |
| Q21.S2 | I am not going to vaccinate my kids                                                                                                                                                                        |
| Q21.S3 | The vaccine has an excellent level of safety                                                                                                                                                               |
| Q21.S4 | The vaccine has not been sufficiently tested                                                                                                                                                               |
| Q21.S5 | I want to wait before I vaccinate my children                                                                                                                                                              |
| Q21.S6 | My children are healthy, they don't need vaccines for them                                                                                                                                                 |
| Q21.S7 | I have vaccinated/will vaccinate my children because they are vulnerable due to pathological conditions                                                                                                    |
